# Supplementary material for: TNFAIP8 promotes AML chemoresistance by activating ERK signaling pathway through interaction with Rac1
Source: PubMed Central journal article supplement (PMC7427779; doi:10.1186/s13046-020-01658-z), 2020-08-14
Supplement: 13046_2020_1658_MOESM1_ESM.pdf [file 13046_2020_1658_MOESM1_ESM.pdf]

**Table S1 Transcription factors that bound around TNFAIP8 gene**

| Transcription factor | Official Full Name                                      | Number of samples found (upstream) | Number of samples found (downstream) | Number of binding sites contain motif (upstream) | Number of binding sites contain motif (downstream) |
|----------------------|---------------------------------------------------------|------------------------------------|--------------------------------------|--------------------------------------------------|----------------------------------------------------|
| ARNT                 | aryl hydrocarbon receptor nuclear translocator          | 0                                  | 1                                    | 0                                                | 1                                                  |
| ATF2                 | activating transcription factor 2                       | 1                                  | 0                                    | 1                                                | 0                                                  |
| BARHL1               | BarH-like homeobox 1                                    | 0                                  | 1                                    | 0                                                | 1                                                  |
| BCLAF1               | BCL2-associated transcription factor 1                  | 0                                  | 1                                    | 0                                                | 1                                                  |
| CEBPA                | CCAAT/enhancer binding protein (C/EBP), alpha           | 0                                  | 2                                    | 0                                                | 2                                                  |
| CEBPD                | CCAAT/enhancer binding protein (C/EBP), delta           | 0                                  | 1                                    | 0                                                | 1                                                  |
| CREB1                | cAMP responsive element binding protein 1               | 4                                  | 0                                    | 4                                                | 0                                                  |
| CTCF                 | CCCTC-binding factor (zinc finger protein)              | 5                                  | 0                                    | 5                                                | 0                                                  |
| E2F1                 | E2F transcription factor 1                              | 0                                  | 2                                    | 0                                                | 2                                                  |
| E2F4                 | E2F transcription factor 4, p107/p130-binding           | 0                                  | 2                                    | 0                                                | 2                                                  |
| E2F6                 | E2F transcription factor 6                              | 0                                  | 2                                    | 0                                                | 2                                                  |
| EBF1                 | early B-cell factor 1                                   | 0                                  | 1                                    | 0                                                | 1                                                  |
| EGR1                 | early growth response 1                                 | 3                                  | 0                                    | 3                                                | 0                                                  |
| ELF1                 | E74-like factor 1 (ets domain transcription factor)     | 6                                  | 1                                    | 7                                                | 1                                                  |
| ELK3                 | ELK3, ETS-domain protein (SRF accessory protein 2)      | 1                                  | 0                                    | 1                                                | 0                                                  |
| ERG                  | v-ets avian erythroblastosis virus E26 oncogene homolog | 1                                  | 1                                    | 1                                                | 1                                                  |
| ETS1                 | v-ets avian erythroblastosis virus E26 oncogene homolog | 1                                  | 2                                    | 1                                                | 2                                                  |
| FOXA1                | forkhead box A1                                         | 0                                  | 1                                    | 0                                                | 1                                                  |
| FOXD2                | forkhead box D2                                         | 0                                  | 1                                    | 0                                                | 1                                                  |
| FOXP2                | forkhead box P2                                         | 0                                  | 1                                    | 0                                                | 1                                                  |
| GATA1                | GATA binding protein 1 (globin transcription factor 1)  | 0                                  | 1                                    | 0                                                | 1                                                  |
| GATA3                | GATA binding protein 3                                  | 0                                  | 2                                    | 0                                                | 2                                                  |
| GATA4                | GATA binding protein 4                                  | 0                                  | 1                                    | 0                                                | 1                                                  |
| GATA6                | GATA binding protein 6                                  | 0                                  | 2                                    | 0                                                | 2                                                  |
| GMEB2                | glucocorticoid modulatory element binding protein 2     | 1                                  | 0                                    | 1                                                | 0                                                  |
| HOXC6                | homeobox C6                                             | 0                                  | 1                                    | 0                                                | 1                                                  |
| IRF1                 | interferon regulatory factor 1                          | 0                                  | 1                                    | 0                                                | 1                                                  |
| KDM5A                | lysine (K)-specific demethylase 5A                      | 1                                  | 0                                    | 1                                                | 0                                                  |
| KDM5B                | lysine (K)-specific demethylase 5B                      | 0                                  | 1                                    | 0                                                | 2                                                  |

|        |                                                            |   |   |   |   |
|--------|------------------------------------------------------------|---|---|---|---|
| KLF4   | Kruppel-like factor 4 (gut)                                | 1 | 0 | 1 | 0 |
| KLF5   | Kruppel-like factor 5 (intestinal)                         | 1 | 1 | 1 | 1 |
| LEF1   | lymphoid enhancer-binding factor 1                         | 0 | 1 | 0 | 1 |
| MTA3   | metastasis associated 1 family member 3                    | 1 | 0 | 1 | 0 |
| MYB    | v-myb avian myeloblastosis viral oncogene homolog          | 1 | 0 | 1 | 0 |
| MYBL2  | v-myb avian myeloblastosis viral oncogene homolog-like 2   | 0 | 1 | 0 | 1 |
| MYC    | v-myc avian myelocytomatosis viral oncogene homolog        | 1 | 1 | 1 | 1 |
| NFYA   | nuclear transcription factor Y subunit alpha               | 1 | 0 | 1 | 0 |
| NFYB   | nuclear transcription factor Y subunit beta                | 2 | 0 | 2 | 0 |
| PAX5   | paired box 5                                               | 1 | 1 | 1 | 1 |
| RARG   | retinoic acid receptor, gamma                              | 1 | 0 | 1 | 0 |
| RCOR1  | REST corepressor 1                                         | 0 | 1 | 0 | 1 |
| RELA   | v-rel avian reticuloendotheliosis viral oncogene homolog A | 0 | 2 | 0 | 2 |
| RFX1   | regulatory factor X1                                       | 1 | 0 | 1 | 0 |
| SNAI2  | snail family zinc finger 2                                 | 0 | 4 | 0 | 4 |
| SP1    | Sp1 transcription factor                                   | 1 | 0 | 1 | 0 |
| SP3    | Sp3 transcription factor                                   | 0 | 1 | 0 | 1 |
| SP4    | Sp4 transcription factor                                   | 1 | 0 | 1 | 0 |
| STAT4  | signal transducer and activator of transcription 4         | 1 | 0 | 1 | 0 |
| STAT5A | signal transducer and activator of transcription 5A        | 1 | 2 | 1 | 2 |
| TAL1   | T-cell acute lymphocytic leukemia 1                        | 0 | 4 | 0 | 4 |
| TBP    | TATA-box binding protein                                   | 0 | 1 | 0 | 1 |
| TFDP2  | transcription factor Dp-2 (E2F dimerization partner 2)     | 0 | 1 | 0 | 1 |
| TP63   | tumor protein p63                                          | 0 | 5 | 0 | 5 |
| UBTF   | upstream binding transcription factor, RNA polymerase I    | 0 | 1 | 0 | 1 |
| YY1    | YY1 transcription factor                                   | 6 | 1 | 6 | 1 |
| ZFP42  | ZFP42 zinc finger protein                                  | 0 | 1 | 0 | 1 |

ChIPBase v2.0 project, hg38, the statistics of transcription factors that bound around TNFAIP8(ENSG00000145779.7) gene  
The number column below is corresponding to the motif status
